# Supplementary material for: Absence of the kinase S6k1 mimics the effect of chronic endurance exercise on glucose tolerance and muscle oxidative stress
Source: PubMed Central journal article supplement — Mol Metab. 2017 Aug 25;6(11):1443–53. doi: 10.1016/j.molmet.2017.08.008 (PMC5681242; doi:10.1016/j.molmet.2017.08.008), 2017-08-25
Supplement: mmc1.pdf [file mmc1.pdf]

|                       | <b>WT sedentary</b><br><b>(ng/ml)</b><br><b>(n=8-10)</b> | <b>WT trained</b><br><b>(ng/ml)</b><br><b>(n=9-11)</b> | <b>S6K1KO sedentary</b><br><b>(ng/ml)</b><br><b>(n=9-11)</b> | <b>S6K1KO trained</b><br><b>(ng/ml)</b><br><b>(n=9-11)</b> |
|-----------------------|----------------------------------------------------------|--------------------------------------------------------|--------------------------------------------------------------|------------------------------------------------------------|
| <b>Insulin</b>        | 10.29±1.92                                               | 5.86±1.33                                              | <b>5.77±1.03<sup>#</sup></b>                                 | 4.42±0.98                                                  |
| <b>Leptin</b>         | 25.07±7.86                                               | 17.62±4.43                                             | 9.22±2.61                                                    | 11.24±4.16                                                 |
| <b>Resistin</b>       | 246.4±31.33                                              | 184.57±27.57                                           | 263.0±46.49                                                  | 319.8±62.5                                                 |
| <b>Adiponectin</b>    | 12912±405.7                                              | 12928±478.5                                            | <b>9011±748.3<sup>####</sup></b>                             | <b>9931±536.3<sup>##</sup></b>                             |
| <b>PAI-1</b>          | 3.51±0.5                                                 | <b>1.66±0.22<sup>**</sup></b>                          | 2.7±0.36                                                     | <b>3.03±0.38<sup>#</sup></b>                               |
| <b>Ghrelin</b>        | 12.56±1.34                                               | <b>6.02±1.24<sup>**</sup></b>                          | 12.48±1.49                                                   | <b>13.91±1.52<sup>###</sup></b>                            |
| <b>GIP</b>            | 0.76±0.09                                                | 0.74±0.13                                              | 0.72±0.08                                                    | 0.67±0.07                                                  |
| <b>GLP-1</b>          | ORR                                                      | ORR                                                    | ORR                                                          | ORR                                                        |
| <b>Glucagon</b>       | 0.36±0.05                                                | 0.30±0.03                                              | 0.37±0.04                                                    | 0.33±0.03                                                  |
| <b>Corticosterone</b> | 74.46±11.45                                              | <b>135.65±15.57<sup>**</sup></b>                       | 82.01±13.8                                                   | <b>54.36±9.84<sup>####</sup></b>                           |

|                                     | <b>WT sedentary</b><br><b>(n=9-10)</b> | <b>WT trained</b><br><b>(n=10-11)</b> | <b>S6K1KO sedentary</b><br><b>(n=10-11)</b> | <b>S6K1KO trained</b><br><b>(n=10-11)</b> |
|-------------------------------------|----------------------------------------|---------------------------------------|---------------------------------------------|-------------------------------------------|
| <b>Lactate (nmol/μl)</b>            | 5.05±0.7                               | 3.58±0.32                             | 3.74±0.45                                   | 3.28±0.31                                 |
| <b>TAG (nmol/μl)</b>                | 0.32±0.03                              | 0.34±0.02                             | 0.31±0.02                                   | 0.30±0.01                                 |
| <b>NEFA (mmol/L)</b>                | 0.93±0.04                              | <b>1.20±0.05<sup>***</sup></b>        | 1.02±0.06                                   | 1.15±0.05                                 |
| <b>Cholesterol (nmol/μl)</b>        | 0.60±0.06                              | <b>0.91±0.07<sup>**</sup></b>         | 0.67±0.06                                   | <b>0.53±0.04<sup>####</sup></b>           |
| <b>Total Ketone Bodies (μmol/L)</b> | 528.3±45.04                            | <b>887.3±54.06<sup>****</sup></b>     | 815.0±54.81 <sup>###</sup>                  | <b>1024.0±64.0<sup>*</sup></b>            |

|                              | <b>WT sedentary</b><br><b>[mg/dl]</b><br><b>(n=10)</b> | <b>WT exercised</b><br><b>[mg/dl]</b><br><b>(n=10)</b> | <b>S6K1KO sedentary</b><br><b>[mg/dl]</b><br><b>(n=10)</b> | <b>S6K1KO exercised</b><br><b>[mg/dl]</b><br><b>(n=10)</b> |
|------------------------------|--------------------------------------------------------|--------------------------------------------------------|------------------------------------------------------------|------------------------------------------------------------|
| <b>Blood Glucose (mg/dL)</b> | 230.1±11.2                                             | 206.8±3.7                                              | 232.6±15.1                                                 | <b>182.0±12.8<sup>**</sup></b>                             |

**Supplementary Table 1 – Plasma parameters after 4 weeks of chronic endurance exercise training.** Data presented as mean ± SEM, Statistical analyses were performed by two-way ANOVA with Bonferroni post-test, sedentary vs. exercised: \*p<0.05, \*\*p<0.01, \*\*\*p<0.001, \*\*\*\*p<0.0001; WT vs. S6K1KO: #p<0.05 ##p<0.01 ###p<0.001 ####p<0.0001.

| <b>Gene</b>             | <b>Primer Sequence</b>                                                                   |
|-------------------------|------------------------------------------------------------------------------------------|
| <i>Atf4</i>             | Forward: 5'- GAGCTTCCTGAACAGCGAAGTG -3'<br>Reverse: 5'- TGGCCACCTCCAGATAGTCATC -3'       |
| <i>Cat</i>              | Forward: 5'- AGCGACCAGATGAAGCAGTG -3'<br>Reverse: 5'- TCCGCTCTCTGTCAAAGTGTG -3'          |
| <i>Il1</i>              | Forward: 5'- TCGCTCAGGGTCACAAGAAA -3'<br>Reverse: 5'- CATCAGAGGCAAGGAGGAAAAC -3'         |
| <i>Nadphox</i>          | Forward: 5'- TTGGGTCAGCACTGGCTCTG -3'<br>Reverse: 5'- TGGCGGTGTGCAGTGCTATC -3'           |
| <i>Sod1</i>             | Forward: 5'- AACCAGTTGTGTTGTCAGGAC -3'<br>Reverse: 5'- CCACCATGTTTCTTAGAGTGAGG -3'       |
| <i>Sod2</i>             | Forward: 5'- CAGACCTGCCTTACGACTATGG -3'<br>Reverse: 5'- CAGACCTGCCTTACGACTATGG -3'       |
| <i>Xbp1 (spliced)</i>   | Forward: 5'- GAGTCCGCAGCAGGTG -3'<br>Reverse: 5'- GTGTCAGAGTCCATGGGA -3'                 |
| <i>Xbp1 (unspliced)</i> | Forward: 5'- TGAGAACCAGGAGTTAAGAACACGC -3'<br>Reverse: 5'- TTCTGGGTAGACCTCTGGGAGTTCC -3' |

**Supplementary Table 2 – Primer Sequences for SYBR Green Real-Time PCR.** *Atf4*= activating transcription factor 4, *Cat*= Catalase, *Il1*= Interleukin-1, *Nadphox*= NADPH oxidase, *Sod1*= Superoxide dismutase [Cu-Zn], *Sod2*= Superoxide dismutase [Mn], mitochondrial, *Xbp1*= X-box-binding protein 1.

| <b>Target protein</b>                         | <b>Provider</b> |          |
|-----------------------------------------------|-----------------|----------|
| <b>ACC</b>                                    | Cell Signaling  | #3662    |
| <b>AMPK</b>                                   | Cell Signaling  | #2532    |
| <b>GAPDH</b>                                  | Cell Signaling  | #2118    |
| <b>GS</b>                                     | Cell Signaling  | #3893    |
| <b>GSK3</b>                                   | Cell Signaling  | #9338    |
| <b>mTOR</b>                                   | Cell Signaling  | #2972    |
| <b>PCK1</b>                                   | Abcam           | Ab87340  |
| <b>PCK2</b>                                   | Cell Signaling  | #6924    |
| <b>PERK</b>                                   | Cell Signaling  | #3192    |
| <b>PGC1<math>\alpha</math></b>                | Abcam           | Ab72230  |
| <b>phospho(Ser240/244)-S6</b>                 | Cell Signaling  | #5364    |
| <b>phospho(Ser2448)-mTOR</b>                  | Cell Signaling  | #2971    |
| <b>phospho(Ser51)-eIF2<math>\alpha</math></b> | Cell Signaling  | #9721    |
| <b>phospho(Ser641)-GS</b>                     | Cell Signaling  | #3891    |
| <b>phospho(Ser97)-ACC</b>                     | Cell Signaling  | #3661    |
| <b>phospho(Thr183/Tyr185)-SAPK/JNK</b>        | Cell Signaling  | #4668    |
| <b>phospho(Thr980)-PERK</b>                   | Cell Signaling  | #3179    |
| <b>phospho(Thr172)-AMPK</b>                   | Cell Signaling  | #2531    |
| <b>PYGB</b>                                   | Santa Cruz      | Sc-46347 |
| <b>S6</b>                                     | Cell Signaling  | #2217    |
| <b>S6K1</b>                                   | Cell Signaling  | #9202    |
| <b>SAPK/JNK</b>                               | Cell Signaling  | #9252    |

**Supplementary Table 3 – Primary antibodies for Western Blot analyses** ACC, Acetyl-CoA carboxylase, AMPK, 5'-AMP-activated protein kinase, GAPDH, Glyceraldehyde-3-phosphate dehydrogenase, GS, Glycogen Synthase, GSK3, Glycogen synthase kinase-3, mTOR, mammalian target of rapamycin, PCK1, cytosolic phosphoenolpyruvate carboxykinase, PCK2, mitochondrial phosphoenolpyruvate carboxykinase, PERK, PRKR-like endoplasmic reticulum kinase, PGC1 $\alpha$ , Peroxisome proliferator-activated receptor gamma coactivator 1-alpha, eIF2 $\alpha$ , eukaryotic translation initiation factor 2-alpha, PYGB, Glycogen Phosphorylase, S6, ribosomal protein S6, S6K1, ribosomal protein S6 kinase-1, SAPK/JNK, C-Jun-amino-terminal kinase.

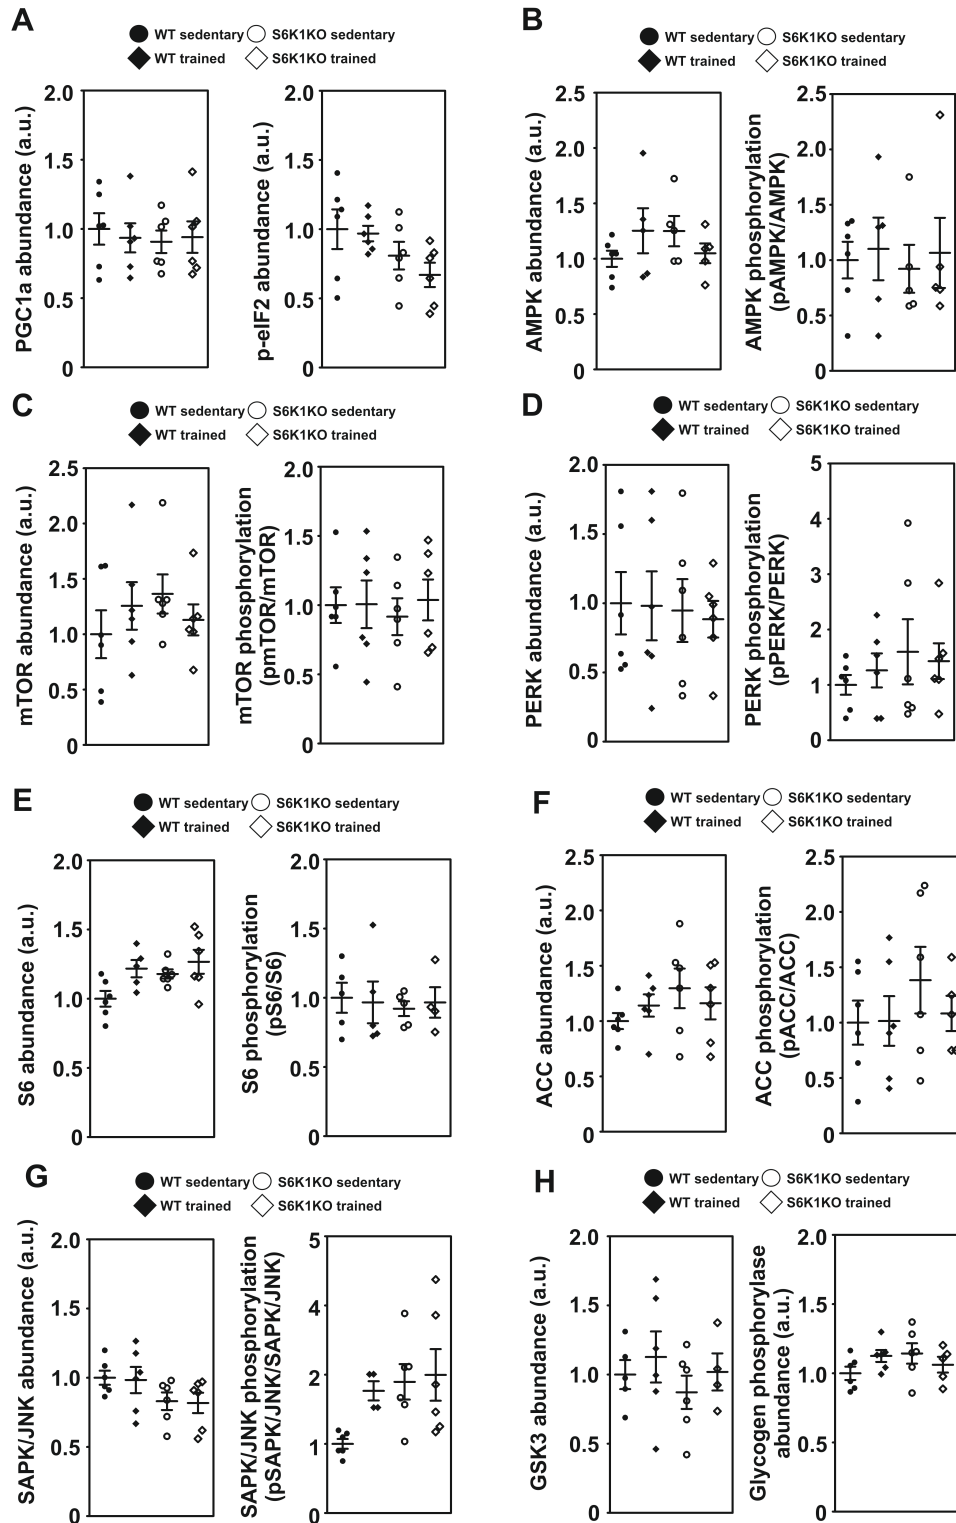

**Supplementary Figure S1 – Effect of exercise and S6K1 knockout on abundance of proteins involved in skeletal muscle energy metabolism.** Protein abundance was determined by Western Blot analysis and results were normalized by GAPDH abundance and WT sedentary controls. (A) PGC1 $\alpha$  and p-eIF2 $\alpha$ , (B) (phosphor-)AMPK, (C) (phospho-)mTOR, (D) (phospho-)PERK, (E) (phosphor-)S6, (F) (phospho)-(ACC), (G) (phospho-)SAPK/JNK in skeletal muscle and (H) GSK3 in liver. Data presented as mean  $\pm$  SEM (n=6-8), Statistical analyses were performed by two-way ANOVA with Bonferroni post-test.

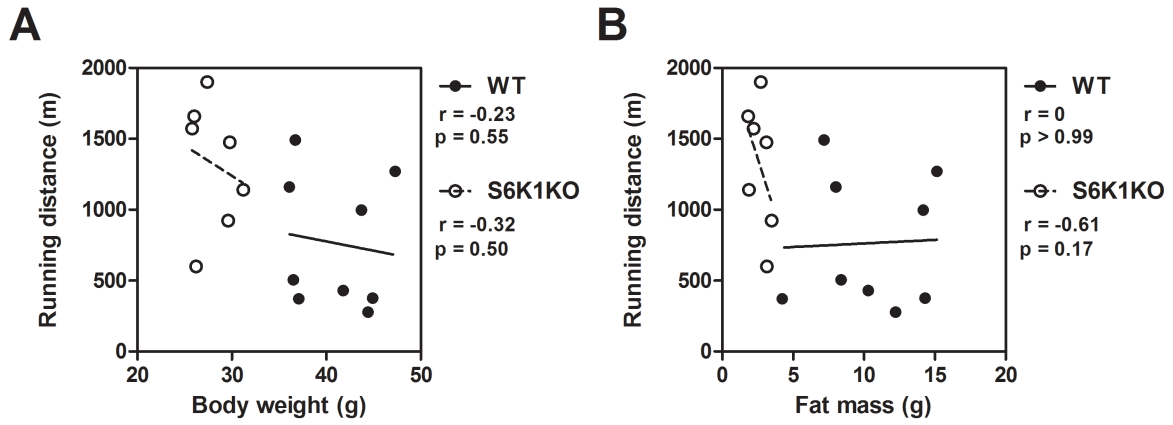

**Supplementary Figure S2 – Correlation of body weight, body fat and running endurance.** (A) Correlation of body weight (A) and body fat (B) with maximal running distance of WT and S6K1KO mice. Statistical analysis was performed using nonparametric Spearman correlation analysis. (n=7-9).

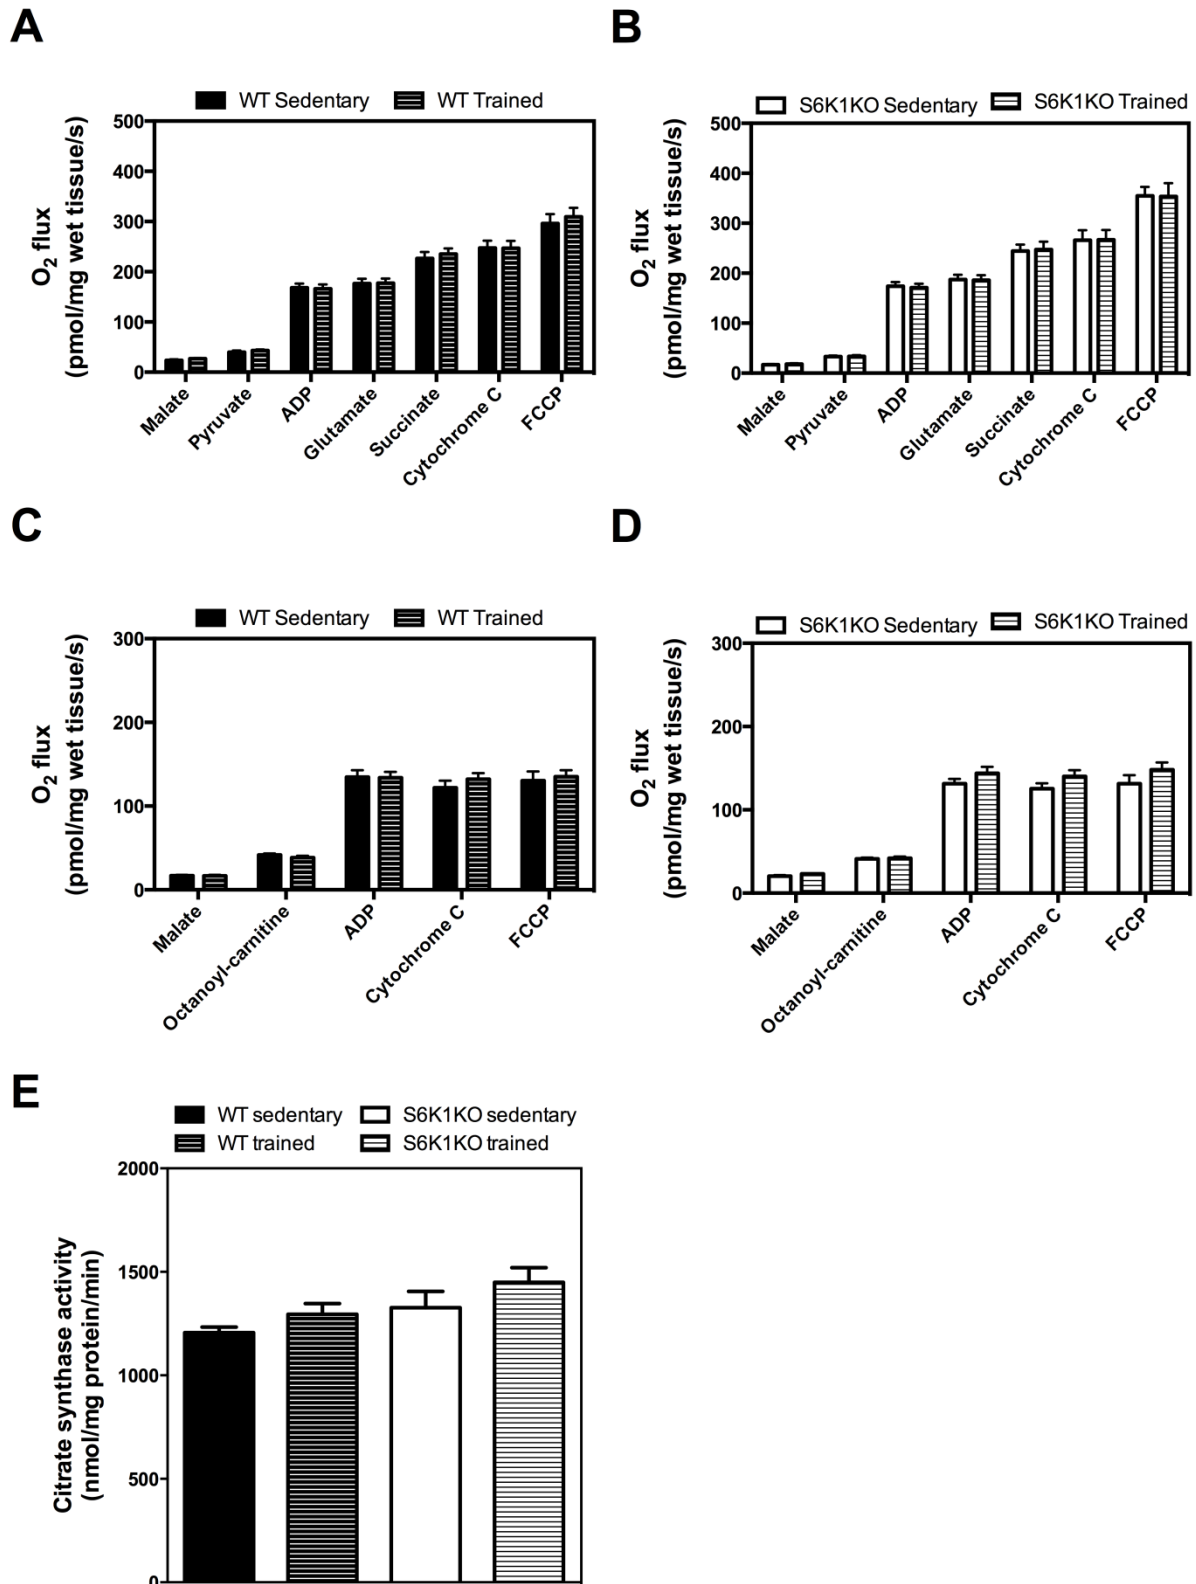

**Supplementary Figure S3 – Mitochondrial oxidative capacity and citrate synthase activity in the soleus muscle of sedentary and trained mice WT and S6K1KO genotype.** Oxygen flux was analyzed at different respiratory states using the substrates of tricarboxylic acid (TCA) cycle (A, B) as well as  $\beta$ -oxidation (C, D). Mitochondrial density was assessed from the citrate synthase activity (E). Data are presented as mean  $\pm$  SEM (n=8-10), Statistical analyses were performed by two-way ANOVA with Bonferroni post-test, sedentary vs. exercised: \*p<0.05.

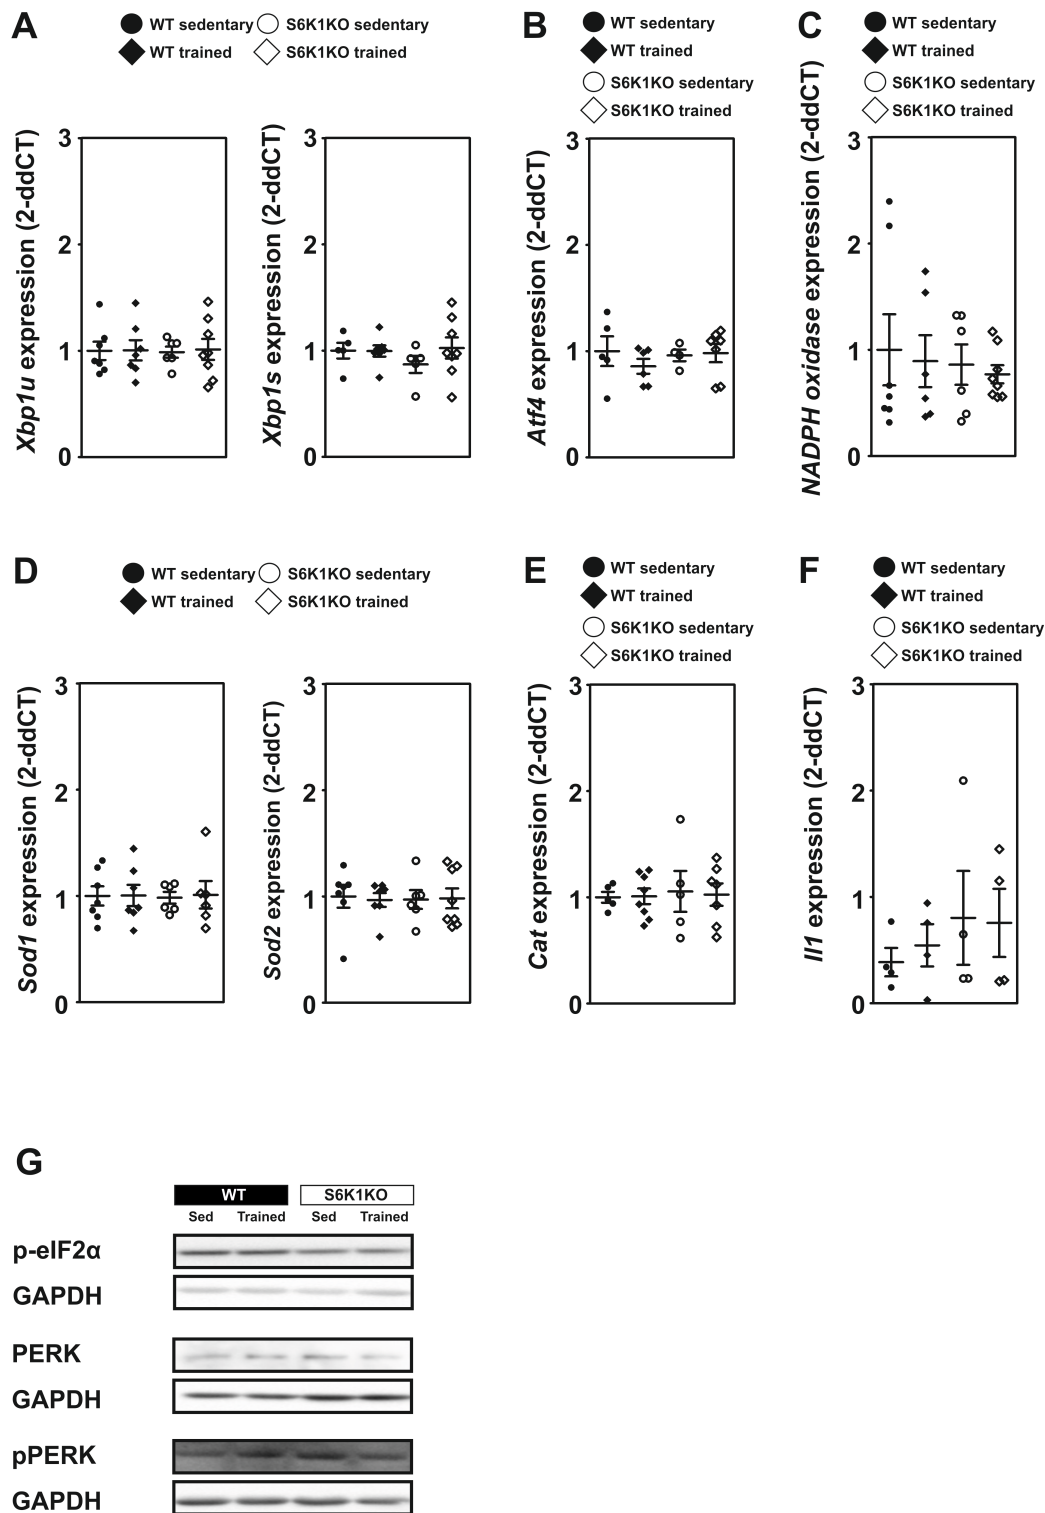

**Supplementary Figure S4 – Transcriptional markers for ER-stress are not altered through the ablation of *S6k1* nor due to chronic endurance exercise.** Gene expression analysis was assessed via quantitative PCR (qPCR) and results were normalized by gene expression of  $\beta$ -actin and the wild type sedentary group. (A) Gene expression of spliced (*Xbp1u*) and unspliced (*Xbp1s*) form of *Xbp1*, (B) *Atf4*, (C) *Nadphox* (D) *Sod1* and *Sod2*, (E) *Cat* and (F) *Interleukin-1*. Data presented as mean  $\pm$  SEM. (G) Representative Western Blots of phospho-eIF2 $\alpha$  and (phospho-)PERK in red part of gastrocnemius muscle. Data presented as mean  $\pm$  SEM (n=6-8), Statistical analyses were performed by two-way ANOVA with Bonferroni post-test.
